# Supplementary material for: Value of lymph node ratio as a prognostic factor of recurrence in medullary thyroid cancer
Source: PeerJ. 2023 Mar 13;11:e15025. doi: 10.7717/peerj.15025 (PMC10019331; doi:10.7717/peerj.15025)
Supplement: Supplemental Information 1 [file peerj-11-15025-s001.xlsx]

## Sheet: Sheet1
Number	Sex	Age	Follow-up duration	Survival time	Survival status	Recurrence	DFS	Multifocality	Lymph node dissection	Bilateral	Extrathyroidal extension	Tumor size	Tumor size grouping	level VI LN dissected	level VI LN positive	lateral neck LN dissected	lateral neck LN positive	Resected lymph nodes	Resected lymph nodes grouping	Metastasized lymph nodes	Metastasized lymph nodes grouping	LNR	LNR grouping	N classification 1	N classification 2	T classification 1	T classification 2	TNM stage 1	TNM stage 2	Preoperative calcitonin	Preoperative calcitonin grouping	Biochemical cure
1	Male	14	62	62	survival	no	62	no	CLND + LLND	no	yes	3	>2	3	0	41	0	44	>10	0	≤10	0	≤0.24	N0	N0/N1a	T3	T3/T4	I/II	II	1537	＞300	yes
2	Female	19	39	39	survival	no	39	yes	CLND + LLND	yes	no	1.8	<=2	6	0	21	3	27	>10	3	≤10	0.111111	≤0.24	N1b	N1b	T1	T1/T2	III/IV	IV	123	≤300	no
3	Female	24	41	16	death	yes	10	no	CLND + LLND	no	yes	4	>2	0	0	34	23	34	>10	23	>10	0.676471	＞0.24	N1b	N1b	T4	T3/T4	III/IV	IV	2000	＞300	no
4	Male	24	14	14	survival	no	14	yes	CLND + LLND	yes	no	1.4	<=2	11	6	21	10	32	>10	16	>10	0.5	＞0.24	N1b	N1b	T1	T1/T2	III/IV	IV	2000	＞300	no
5	Female	26	61	61	survival	no	61	yes	Only CLND	no	yes	0.6	<=2	1	1	0	0	1	≤10	1	≤10	1	＞0.24	N1a	N0/N1a	T3	T3/T4	III/IV	III	80.2	≤300	yes
6	Female	27	20	20	survival	no	20	no	Only CLND	no	no	3	>2	9	0	0	0	9	≤10	0	≤10	0	≤0.24	N0	N0/N1a	T2	T1/T2	I/II	II	613	＞300	yes
7	Female	28	34	34	survival	no	34	yes	Only CLND	yes	no	4	>2	8	0	0	0	8	≤10	0	≤10	0	≤0.24	N0	N0/N1a	T2	T1/T2	I/II	II	2000	＞300
8	Male	28	60	60	survival	no	60	yes	Only CLND	yes	yes	0.3	<=2	0	0	0	0	0	≤10	0	≤10			N0	N0/N1a	T3	T3/T4	I/II	II	27.8	≤300	yes
9	Male	29	15	15	survival	no	15	yes	Only CLND	yes	no	4	>2	7	0	0	0	7	≤10	0	≤10	0	≤0.24	N0	N0/N1a	T2	T1/T2	I/II	II	1317	＞300	no
10	Female	29	105	105	survival	no	105	no	CLND + LLND	no	no	1	<=2	3	3	22	1	25	>10	4	≤10	0.16	≤0.24	N1b	N1b	T1	T1/T2	III/IV	IV	1142	＞300	no
11	Female	30	26	26	survival	no	26	yes	CLND + LLND	no	yes	3	>2	13	13	30	12	43	>10	25	>10	0.581395	＞0.24	N1b	N1b	T3	T3/T4	III/IV	IV	2000	＞300	no
12	Female	32	18	18	survival	no	18	no	Only CLND	no	no	0.7	<=2	1	0	0	0	1	≤10	0	≤10	0	≤0.24	N0	N0/N1a	T1	T1/T2	I/II	I	8.54	≤300	yes
13	Male	32	21	21	survival	no	21	no	Only CLND	no	no	1.2	<=2	4	1	0	0	4	≤10	1	≤10	0.25	＞0.24	N1a	N0/N1a	T1	T1/T2	III/IV	III	166	≤300	yes
14	Female	32	51	51	survival	no	51	no	Only CLND	no	yes	0.9	<=2	2	2	0	0	2	≤10	2	≤10	1	＞0.24	N1a	N0/N1a	T3	T3/T4	III/IV	III	315	＞300	no
15	Male	32	63	63	survival	no	63	yes	Only CLND	no	no	1.5	<=2	0	0	0	0	0	≤10	0	≤10			N0	N0/N1a	T1	T1/T2	I/II	I	715	＞300	yes
16	Male	33	64	64	survival	no	64	no	CLND + LLND	no	no	1	<=2	1	0	39	3	40	>10	3	≤10	0.075	≤0.24	N1b	N1b	T1	T1/T2	III/IV	IV	135	≤300	yes
17	Female	34	27	27	survival	no	27	no	CLND + LLND	no	no	1.7	<=2	0	0	14	0	14	>10	0	≤10	0	≤0.24	N0	N0/N1a	T1	T1/T2	I/II	I	341	＞300	yes
18	Male	34	53	53	survival	no	53	yes	CLND + LLND	no	no	1.8	<=2	6	6	10	1	16	>10	7	≤10	0.4375	＞0.24	N1b	N1b	T1	T1/T2	III/IV	IV	1183	＞300	yes
19	Female	35	39	39	survival	no	39	no	Only CLND	no	no	1.2	<=2	4	1	0	0	4	≤10	1	≤10	0.25	＞0.24	N1a	N0/N1a	T1	T1/T2	III/IV	III	1034	＞300	yes
20	Male	35	41	41	survival	no	41	no	CLND + LLND	no	no	0.7	<=2	4	2	25	2	29	>10	4	≤10	0.137931	≤0.24	N1b	N1b	T1	T1/T2	III/IV	IV	319	＞300	yes
21	Male	35	53	53	survival	no	53	no	CLND + LLND	no	no	2.3	>2	2	0	35	0	37	>10	0	≤10	0	≤0.24	N0	N0/N1a	T2	T1/T2	I/II	II	1142	＞300	yes
22	Female	36	10	10	survival	no	10	yes	CLND + LLND	yes	no	1.6	<=2	6	6	21	3	27	>10	9	≤10	0.333333	＞0.24	N1b	N1b	T1	T1/T2	III/IV	IV	1061	＞300	no
23	Female	36	41	41	survival	no	41	yes	Only CLND	yes	no	2.5	>2	6	0	0	0	6	≤10	0	≤10	0	≤0.24	N0	N0/N1a	T2	T1/T2	I/II	II	1356	＞300	yes
24	Female	36	43	43	survival	no	43	yes	CLND + LLND	no	no	0.7	<=2	14	14	86	62	100	>10	76	>10	0.76	＞0.24	N1b	N1b	T1	T1/T2	III/IV	IV	2000	＞300	no
25	Male	36	52	52	survival	no	52	no	CLND + LLND	no	yes	0.8	<=2	5	3	42	0	47	>10	3	≤10	0.06383	≤0.24	N1a	N0/N1a	T3	T3/T4	III/IV	III	697	＞300	no
26	Male	36	65	65	survival	no	65	no		no	no	0.3	<=2											N0	N0/N1a	T1	T1/T2	I/II	I	89.5	≤300
27	Male	37	27	27	survival	no	27	no	CLND + LLND	no	no	1.2	<=2	2	1	71	2	73	>10	3	≤10	0.041096	≤0.24	N1b	N1b	T1	T1/T2	III/IV	IV	80.6	≤300	yes
28	Female	38	18	18	survival	yes	5	yes	Only CLND	no	yes	1.3	<=2	4	3	33	6	37	>10	9	≤10	0.243243	＞0.24	N1b	N1b	T3	T3/T4	III/IV	IV	417	＞300	no
29	Female	38	46	46	survival	no	46	no	CLND + LLND	no	yes	3.5	>2	8	0	9	0	17	>10	0	≤10	0	≤0.24	N0	N0/N1a	T3	T3/T4	I/II	II	1944	＞300	yes
30	Male	38	60	60	death	yes	60	yes	CLND + LLND	no	yes	0.8	<=2	3	0	28	8	31	>10	8	≤10	0.258065	＞0.24	N1b	N1b	T4	T3/T4	III/IV	IV	1198	＞300	yes
31	Female	39	71	71	survival	no	71	no	CLND + LLND	no	yes	1.8	<=2	6	0	12	1	18	>10	1	≤10	0.055556	≤0.24	N1b	N1b	T3	T3/T4	III/IV	IV	2000	＞300	no
32	Male	40	19	19	survival	no	19	no	CLND + LLND	no	yes	1.7	<=2	10	7	67	12	77	>10	19	>10	0.246753	＞0.24	N1b	N1b	T4	T3/T4	III/IV	IV	885	＞300	yes
33	Female	40	21	21	survival	no	21	no	Only CLND	no	yes	2	<=2	2	0	0	0	2	≤10	0	≤10	0	≤0.24	N0	N0/N1a	T3	T3/T4	I/II	II	559	＞300	yes
34	Female	40	45	45	survival	yes	22	yes	CLND + LLND	no	yes	1.5	<=2	0	0	33	4	33	>10	4	≤10	0.121212	≤0.24	N1b	N1b	T4	T3/T4	III/IV	IV	384	＞300	no
35	Female	40	100	100	survival	no	100	no	Only CLND	no	no	2.5	>2	4	0	0	0	4	≤10	0	≤10	0	≤0.24	N0	N0/N1a	T2	T1/T2	I/II	II	374	＞300	yes
36	Female	41	23	23	survival	no	23	no	CLND + LLND	no	no	1	<=2	2	0	26	8	28	>10	8	≤10	0.285714	＞0.24	N1b	N1b	T1	T1/T2	III/IV	IV	286	≤300	no
37	Male	41	36	36	survival	no	35	yes	CLND + LLND	no	yes	1.8	<=2	6	3	38	2	44	>10	5	≤10	0.113636	≤0.24	N1b	N1b	T3	T3/T4	III/IV	IV	2000	＞300	no
38	Female	41	89	89	survival	no	89	no	Only CLND	no	no	0.4	<=2	5	0	0	0	5	≤10	0	≤10	0	≤0.24	N0	N0/N1a	T1	T1/T2	I/II	I	19.5	≤300	yes
39	Female	41	96	96	survival	no	96	no	CLND + LLND	no	no	0.4	<=2	0	0	9	0	9	≤10	0	≤10	0	≤0.24	N0	N0/N1a	T1	T1/T2	I/II	I	10.6	≤300	yes
40	Female	42	96	52	death	yes	52	no	CLND + LLND	no	yes	2.5	>2	8	1	63	3	71	>10	4	≤10	0.056338	≤0.24	N1b	N1b	T4	T3/T4	III/IV	IV	1332	＞300	yes
41	Male	42	62	62	survival	no	62	no	CLND + LLND	no	no	1.4	<=2	1	1	14	6	15	>10	7	≤10	0.466667	＞0.24	N1b	N1b	T1	T1/T2	III/IV	IV	388	＞300	no
42	Female	42	65	65	survival	no	65	no	Only CLND	no	no	1.2	<=2	1	0	0	0	1	≤10	0	≤10	0	≤0.24	N0	N0/N1a	T1	T1/T2	I/II	I	309	＞300	yes
43	Female	43	92	92	survival	no	92	no	Only CLND	no	no	0.94	<=2	7	5	13	0	20	>10	5	≤10	0.25	＞0.24	N1a	N0/N1a	T1	T1/T2	III/IV	III	118	≤300	yes
44	Male	44	52	52	survival	yes	4	no	CLND + LLND	no	no	2.5	>2	0	0	48	20	48	>10	20	>10	0.416667	＞0.24	N1b	N1b	T2	T1/T2	III/IV	IV	2000	＞300	no
45	Male	44	48	47	death	yes	25	yes	CLND + LLND	no	yes	1.2	<=2	3	3	35	34	38	>10	37	>10	0.973684	＞0.24	N1b	N1b	T3	T3/T4	III/IV	IV	2000	＞300
46	Female	44	36	36	survival	no	36	no	Only CLND	no	no	0.3	<=2	5	0	0	0	5	≤10	0	≤10	0	≤0.24	N0	N0/N1a	T1	T1/T2	I/II	I	4.91	≤300
47	Female	44	43	43	survival	no	43	yes	Only CLND	yes	yes	0.8	<=2	11	0	0	0	11	>10	0	≤10	0	≤0.24	N0	N0/N1a	T3	T3/T4	I/II	II	202	≤300	yes
48	Male	45	52	52	survival	yes	5	yes	CLND + LLND	no	yes	1.5	<=2	13	13	32	0	45	>10	13	>10	0.288889	＞0.24	N1a	N0/N1a	T3	T3/T4	III/IV	III	1609	＞300	no
49	Male	45	44	44	survival	yes	10	yes	CLND + LLND	no	no	1.8	<=2	0	0	15	4	15	>10	4	≤10	0.266667	＞0.24	N1b	N1b	T1	T1/T2	III/IV	IV	1799	＞300	no
50	Male	45	47	25	death	yes	13	no	CLND + LLND	no	no	2.5	>2	1	1	16	7	17	>10	8	≤10	0.470588	＞0.24	N1b	N1b	T2	T1/T2	III/IV	IV	2000	＞300	no
51	Female	45	29	29	survival	no	29	no	CLND + LLND	no	no	2.5	>2	1	0	12	0	13	>10	0	≤10	0	≤0.24	N0	N0/N1a	T2	T1/T2	I/II	II	1708	＞300	yes
52	Female	45	49	49	survival	no	49	no	CLND + LLND	no	no	1.8	<=2	11	0	36	3	47	>10	3	≤10	0.06383	≤0.24	N1b	N1b	T1	T1/T2	III/IV	IV	676	＞300	yes
53	Male	45	83	83	survival	yes	64	yes	CLND + LLND	yes	yes	3.5	>2	1	1	23	13	24	>10	14	>10	0.583333	＞0.24	N1b	N1b	T4	T3/T4	III/IV	IV	2000	＞300
54	Female	45	64	64	survival	no	64	yes	Only CLND	no	yes	3	>2	4	0	0	0	4	≤10	0	≤10	0	≤0.24	N0	N0/N1a	T3	T3/T4	I/II	II	2000	＞300	yes
55	Female	45	100	100	survival	no	100	yes	CLND + LLND	no	yes	2.5	>2	1	1	16	7	17	>10	8	≤10	0.470588	＞0.24	N1b	N1b	T4	T3/T4	III/IV	IV	1278	＞300	no
56	Female	46	23	23	survival	no	23	no	Only CLND	no	no	0.4	<=2	1	0	0	0	1	≤10	0	≤10	0	≤0.24	N0	N0/N1a	T1	T1/T2	I/II	I	68.4	≤300	no
57	Female	46	82	82	survival	no	82	no	Only CLND	no	no	0.63	<=2	4	0	0	0	4	≤10	0	≤10	0	≤0.24	N0	N0/N1a	T1	T1/T2	I/II	I	18.8	≤300	yes
58	Male	47	74	10	death	yes	3	no	CLND + LLND	no	no	4	>2	0	0	25	6	25	>10	6	≤10	0.24	＞0.24	N1b	N1b	T2	T1/T2	III/IV	IV	2000	＞300	no
59	Female	47	49	49	survival	yes	5	yes	CLND + LLND	no	yes	1.8	<=2	0	0	14	8	14	>10	8	≤10	0.571429	＞0.24	N1b	N1b	T3	T3/T4	III/IV	IV	986	＞300	no
60	Female	47	20	20	survival	no	20	no	CLND + LLND	no	no	4.5	>2	3	3	30	6	33	>10	9	≤10	0.272727	＞0.24	N1b	N1b	T3	T3/T4	III/IV	IV	23000	＞300	no
61	Female	47	37	37	survival	yes	36	yes	CLND + LLND	yes	yes	1.4	<=2	5	4	14	10	19	>10	14	>10	0.736842	＞0.24	N1b	N1b	T4	T3/T4	III/IV	IV	2000	＞300	no
62	Female	47	39	39	survival	no	39	no	Only CLND	no	no	1	<=2	1	0	0	0	1	≤10	0	≤10	0	≤0.24	N0	N0/N1a	T1	T1/T2	I/II	I	174	≤300
63	Female	47	39	39	survival	no	39	no	Only CLND	no	no	0.5	<=2	1	0	0	0	1	≤10	0	≤10	0	≤0.24	N0	N0/N1a	T1	T1/T2	I/II	I	30.1	≤300	yes
64	Female	47	41	41	survival	no	41	no	CLND + LLND	no	no	1.3	<=2	1	0	12	0	13	>10	0	≤10	0	≤0.24	N0	N0/N1a	T1	T1/T2	I/II	I	960	＞300	yes
65	Male	47	73	73	survival	no	73	no	CLND + LLND	no	yes	2.3	>2	0	0	33	14	33	>10	14	>10	0.424242	＞0.24	N1b	N1b	T4	T3/T4	III/IV	IV	2000	＞300	no
66	Female	48	39	39	survival	yes	39	no	Only CLND	no	no	5	>2	1	0	0	0	1	≤10	0	≤10	0	≤0.24	N0	N0/N1a	T3	T3/T4	I/II	II	2000	＞300	yes
67	Male	48	41	41	survival	no	41	no	Only CLND	no	yes	2.8	>2	9	0	0	0	9	≤10	0	≤10	0	≤0.24	N0	N0/N1a	T4	T3/T4	III/IV	IV	659	＞300	yes
68	Female	48	43	43	survival	no	43	no	Only CLND	no	no	1.5	<=2	5	0	0	0	5	≤10	0	≤10	0	≤0.24	N0	N0/N1a	T1	T1/T2	I/II	I	570	＞300	yes
69	Female	48	52	52	survival	no	52	yes	Only CLND	no	yes	1.2	<=2	2	0	0	0	2	≤10	0	≤10	0	≤0.24	N0	N0/N1a	T3	T3/T4	I/II	II	84.2	≤300	yes
70	Male	49	21	21	survival	no	21	no	Only CLND	no	no	1.5	<=2	0	0	0	0	0	≤10	0	≤10			N0	N0/N1a	T1	T1/T2	I/II	I	171	≤300	no
71	Female	49	53	53	survival	no	53	no	Only CLND	no	no	1	<=2	3	0	0	0	3	≤10	0	≤10	0	≤0.24	N0	N0/N1a	T1	T1/T2	I/II	I	130	≤300	yes
72	Male	49	93	93	survival	no	93	no	CLND + LLND	no	yes	1.6	<=2	3	3	25	2	28	>10	5	≤10	0.178571	≤0.24	N1b	N1b	T4	T3/T4	III/IV	IV	329	＞300	no
73	Male	50	25	25	survival	no	25	no	Only CLND	no	no	0.6	<=2	0	0	0	0	0	≤10	0	≤10			N0	N0/N1a	T1	T1/T2	I/II	I
74	Female	50	87	87	survival	no	87	no	Only CLND	no	no	0.7	<=2	10	1	20	0	30	>10	1	≤10	0.033333	≤0.24	N1a	N0/N1a	T1	T1/T2	III/IV	III	144	≤300	no
75	Male	50	95	95	survival	no	95	no	CLND + LLND	no	no	1.9	<=2	0	0	10	2	10	≤10	2	≤10	0.2	≤0.24	N1b	N1b	T1	T1/T2	III/IV	IV	172	≤300	yes
76	Male	51	100	100	death	yes	48	no	CLND + LLND	no	yes	1.5	<=2	3	2	17	3	20	>10	5	≤10	0.25	＞0.24	N1b	N1b	T4	T3/T4	III/IV	IV	335	＞300	yes
77	Female	51	80	80	survival	no	80	yes	CLND + LLND	no	yes	1.6	<=2	4	4	22	6	26	>10	10	≤10	0.384615	＞0.24	N1b	N1b	T4	T3/T4	III/IV	IV	1663	＞300
78	Female	51	83	83	survival	no	83	yes	Only CLND	yes	yes	1.5	<=2	3	2	0	0	3	≤10	2	≤10	0.666667	＞0.24	N1a	N0/N1a	T3	T3/T4	III/IV	III	234	≤300	no
79	Female	52	11	11	survival	no	11	yes	Only CLND	no	no	0.7	<=2	0	0	0	0	0	≤10	0	≤10			N0	N0/N1a	T1	T1/T2	I/II	I	48.3	≤300	yes
80	Female	52	18	18	survival	no	18	no	Only CLND	no	yes	3.5	>2	4	0	0	0	4	≤10	0	≤10	0	≤0.24	N0	N0/N1a	T3	T3/T4	I/II	II	2000	＞300	yes
81	Male	52	41	41	survival	no	41	yes	CLND + LLND	no	yes	1.5	<=2	2	2	31	9	33	>10	11	>10	0.333333	＞0.24	N1b	N1b	T3	T3/T4	III/IV	IV	1497	＞300	no
82	Male	52	46	46	survival	no	46	no	CLND + LLND	no	no	0.8	<=2	0	0	9	3	9	≤10	3	≤10	0.333333	＞0.24	N1b	N1b	T1	T1/T2	III/IV	IV	2000	＞300	no
83	Female	52	64	64	survival	no	64	no	Only CLND	no	no	1.2	<=2	0	0	0	0	0	≤10	0	≤10			N0	N0/N1a	T1	T1/T2	I/II	I	296	≤300	yes
84	Male	52	79	79	survival	no	79	no	Only CLND	no	yes	0.8	<=2	1	0	0	0	1	≤10	0	≤10	0	≤0.24	N0	N0/N1a	T4	T3/T4	III/IV	IV	122	≤300	yes
85	Female	52	91	91	survival	no	91	no	Only CLND	no	no	1	<=2	7	0	0	0	7	≤10	0	≤10	0	≤0.24	N0	N0/N1a	T1	T1/T2	I/II	I	152	≤300	yes
86	Female	53	36	36	survival	no	36	no	Only CLND	no	yes	0.8	<=2	5	0	0	0	5	≤10	0	≤10	0	≤0.24	N0	N0/N1a	T3	T3/T4	I/II	II	65.5	≤300	yes
87	Male	53	53	53	survival	no	53	no	Only CLND	no	no	0.3	<=2	0	0	0	0	0	≤10	0	≤10			N0	N0/N1a	T1	T1/T2	I/II	I	8.15	≤300
88	Male	53	58	58	survival	no	58	no	CLND + LLND	no	no	1.5	<=2	7	1	34	0	41	>10	1	≤10	0.02439	≤0.24	N1a	N0/N1a	T1	T1/T2	III/IV	III	150	≤300	yes
89	Male	53	70	70	survival	no	70	yes	CLND + LLND	no	yes	1.7	<=2	7	1	25	3	32	>10	4	≤10	0.125	≤0.24	N1b	N1b	T4	T3/T4	III/IV	IV	899	＞300	yes
90	Female	54	20	20	survival	no	20	no	Only CLND	no	no	0.8	<=2	9	0	0	0	9	≤10	0	≤10	0	≤0.24	N0	N0/N1a	T1	T1/T2	I/II	I	27.6	≤300	yes
91	Male	54	51	31	death	yes	31	no	CLND + LLND	no	no	3.5	>2	2	2	25	7	27	>10	9	≤10	0.333333	＞0.24	N1b	N1b	T2	T1/T2	III/IV	IV	1801	＞300	no
92	Male	54	36	36	survival	no	35	no	CLND + LLND	no	yes	2	<=2	6	6	37	6	43	>10	12	>10	0.27907	＞0.24	N1b	N1b	T3	T3/T4	III/IV	IV	1239	＞300	yes
93	Female	54	36	36	survival	no	36	no	Only CLND	no	no	0.8	<=2	7	0	0	0	7	≤10	0	≤10	0	≤0.24	N0	N0/N1a	T1	T1/T2	I/II	I	6.94	≤300	yes
94	Male	54	70	70	survival	no	70	no	Only CLND	no	no	0.82	<=2	8	0	0	0	8	≤10	0	≤10	0	≤0.24	N0	N0/N1a	T1	T1/T2	I/II	I	34.6	≤300	yes
95	Male	54	70	70	survival	no	70	yes	CLND + LLND	no	no	1.5	<=2	2	2	17	5	19	>10	7	≤10	0.368421	＞0.24	N1b	N1b	T1	T1/T2	III/IV	IV	1721	＞300	no
96	Male	54	94	94	survival	no	94	no	Only CLND	no	yes	1.5	<=2	0	0	0	0	0	≤10	0	≤10			N0	N0/N1a	T4	T3/T4	III/IV	IV	861	＞300	no
97	Male	54	104	104	survival	no	104	no	CLND + LLND	no	no	2	<=2	10	9	18	4	28	>10	13	>10	0.464286	＞0.24	N1b	N1b	T1	T1/T2	III/IV	IV	973	＞300	yes
98	Male	55	70	70	survival	yes	10	no	CLND + LLND	no	no	0.5	<=2	4	0	34	4	38	>10	4	≤10	0.105263	≤0.24	N1b	N1b	T1	T1/T2	III/IV	IV	899	＞300	yes
99	Female	55	63	63	survival	no	63	yes	Only CLND	no	yes	0.7	<=2	4	0	0	0	4	≤10	0	≤10	0	≤0.24	N0	N0/N1a	T4	T3/T4	III/IV	IV	52.9	≤300	yes
100	Male	55	81	81	death	yes	81	no	CLND + LLND	no	yes	1	<=2	13	4	37	23	50	>10	27	>10	0.54	＞0.24	N1b	N1b	T3	T3/T4	III/IV	IV	567	＞300
101	Female	56	40	40	survival	yes	23	no	CLND + LLND	no	yes	3.5	>2	8	5	21	6	29	>10	11	>10	0.37931	＞0.24	N1b	N1b	T3	T3/T4	III/IV	IV	482	＞300	no
102	Female	56	29	29	survival	no	29	no	CLND + LLND	no	no	2	<=2	2	0	28	0	30	>10	0	≤10	0	≤0.24	N0	N0/N1a	T1	T1/T2	I/II	I	1497	＞300	yes
103	Male	56	40	40	survival	no	40	no	Only CLND	no	no	2.3	>2	2	0	0	0	2	≤10	0	≤10	0	≤0.24	N0	N0/N1a	T2	T1/T2	I/II	II	2376	＞300	yes
104	Male	56	40	40	survival	no	40	no	Only CLND	no	no	1.3	<=2	3	0	0	0	3	≤10	0	≤10	0	≤0.24	N0	N0/N1a	T1	T1/T2	I/II	I	58.2	≤300
105	Female	56	60	60	survival	no	60	no	Only CLND	no	no	0.8	<=2	5	0	0	0	5	≤10	0	≤10	0	≤0.24	N0	N0/N1a	T1	T1/T2	I/II	I	244	≤300
106	Female	56	94	94	survival	no	94	no	Only CLND	no	no	0.3	<=2	1	1	0	0	1	≤10	1	≤10	1	＞0.24	N1a	N0/N1a	T1	T1/T2	III/IV	III	117	≤300	no
107	Male	56	108	108	survival	no	108	no	Only CLND	no	no	0.5	<=2	0	0	0	0	0	≤10	0	≤10			N0	N0/N1a	T1	T1/T2	I/II	I
108	Female	57	39	39	survival	no	38	no	Only CLND	no	no	1	<=2	2	0	0	0	2	≤10	0	≤10	0	≤0.24	N0	N0/N1a	T1	T1/T2	I/II	I	1353	＞300	yes
109	Female	57	60	60	survival	no	60	no	Only CLND	no	no	1.2	<=2	1	0	0	0	1	≤10	0	≤10	0	≤0.24	N0	N0/N1a	T1	T1/T2	I/II	I	294	≤300	yes
110	Female	57	64	64	survival	no	64	no	Only CLND	no	yes	2.6	>2	2	0	0	0	2	≤10	0	≤10	0	≤0.24	N0	N0/N1a	T3	T3/T4	I/II	II	775	＞300	yes
111	Female	57	84	84	survival	no	84	no	CLND + LLND	no	yes	8	>2	3	1	44	2	47	>10	3	≤10	0.06383	≤0.24	N1b	N1b	T4	T3/T4	III/IV	IV
112	Female	58	20	20	survival	no	20	no	CLND + LLND	no	no	1	<=2	5	2	43	24	48	>10	26	>10	0.541667	＞0.24	N1b	N1b	T1	T1/T2	III/IV	IV
113	Female	58	60	60	survival	no	60	no	CLND + LLND	no	yes	2	<=2	1	1	29	6	30	>10	7	≤10	0.233333	≤0.24	N1b	N1b	T3	T3/T4	III/IV	IV	1995	＞300	no
114	Male	58	68	68	survival	no	68	yes	Only CLND	no	yes	1.2	<=2	3	2	0	0	3	≤10	2	≤10	0.666667	＞0.24	N1a	N0/N1a	T4	T3/T4	III/IV	IV	118	≤300	yes
115	Female	58	71	71	survival	no	71	no	Only CLND	no	no	1.8	<=2	0	0	0	0	0	≤10	0	≤10			N0	N0/N1a	T1	T1/T2	I/II	I	1005	＞300	no
116	Male	59	27	27	survival	no	27	no	CLND + LLND	no	no	1.5	<=2	3	2	42	10	45	>10	12	>10	0.266667	＞0.24	N1b	N1b	T1	T1/T2	III/IV	IV	334	＞300
117	Male	59	28	28	survival	no	28	no	Only CLND	no	yes	1	<=2	4	2	0	0	4	≤10	2	≤10	0.5	＞0.24	N1a	N0/N1a	T3	T3/T4	III/IV	III	11.4	≤300	yes
118	Male	59	28	28	survival	no	28	no	CLND + LLND	no	no	2.3	>2	13	11	25	1	38	>10	12	>10	0.315789	＞0.24	N1b	N1b	T2	T1/T2	III/IV	IV	565	＞300	no
119	Female	59	29	29	survival	no	29	no	CLND + LLND	no	no	3.5	>2	11	9	49	43	60	>10	52	>10	0.866667	＞0.24	N1b	N1b	T2	T1/T2	III/IV	IV	2000	＞300	no
120	Female	59	51	51	survival	no	51	no	CLND + LLND	no	no	2.5	>2	1	0	21	0	22	>10	0	≤10	0	≤0.24	N0	N0/N1a	T2	T1/T2	I/II	II	2000	＞300	yes
121	Male	59	60	60	survival	no	60	yes	CLND + LLND	no	no	0.5	<=2	9	8	27	5	36	>10	13	>10	0.361111	＞0.24	N1b	N1b	T1	T1/T2	III/IV	IV	1952	＞300	yes
122	Female	59	89	89	survival	no	89	no	Only CLND	no	no	2	<=2	0	0	0	0	0	≤10	0	≤10			N0	N0/N1a	T1	T1/T2	I/II	I	626	＞300	yes
123	Female	60	100	6	death	yes	6	no	CLND + LLND	no	yes	4.5	>2	5	5	12	0	17	>10	5	≤10	0.294118	＞0.24	N1a	N0/N1a	T3	T3/T4	III/IV	III
124	Male	60	19	19	survival	no	19	no	CLND + LLND	no	yes	3.3	>2	0	0	36	2	36	>10	2	≤10	0.055556	≤0.24	N1b	N1b	T3	T3/T4	III/IV	IV	348	＞300	yes
125	Female	60	38	38	survival	no	38	no	Only CLND	no	no	2	<=2	1	0	0	0	1	≤10	0	≤10	0	≤0.24	N0	N0/N1a	T1	T1/T2	I/II	I	297	≤300	yes
126	Female	60	38	38	survival	no	38	no	CLND + LLND	no	no	2.2	>2	21	20	46	7	67	>10	27	>10	0.402985	＞0.24	N1b	N1b	T2	T1/T2	III/IV	IV	1993	＞300	no
127	Male	60	50	50	survival	no	50	yes	Only CLND	no	yes	1.5	<=2	0	0	0	0	0	≤10	0	≤10			N0	N0/N1a	T3	T3/T4	I/II	II	284	≤300	yes
128	Male	61	80	80	survival	yes	12	no	Only CLND	no	yes	0.9	<=2	4	3	0	0	4	≤10	3	≤10	0.75	＞0.24	N1a	N0/N1a	T4	T3/T4	III/IV	IV	243	≤300	no
129	Female	61	16	16	survival	no	16	no	Only CLND	no	no	2.5	>2	3	2	0	0	3	≤10	2	≤10	0.666667	＞0.24	N1a	N0/N1a	T2	T1/T2	III/IV	III	285	≤300	yes
130	Female	61	37	37	survival	no	37	no	CLND + LLND	no	no	4	>2	3	0	25	0	28	>10	0	≤10	0	≤0.24	N0	N0/N1a	T2	T1/T2	I/II	II	1973	＞300	yes
131	Female	62	40	40	survival	no	40	yes	Only CLND	no	no	0.4	<=2	0	0	0	0	0	≤10	0	≤10			N0	N0/N1a	T1	T1/T2	I/II	I	6.04	≤300	yes
132	Female	62	43	43	survival	no	43	no	CLND + LLND	no	no	0.6	<=2	15	0	0	0	15	>10	0	≤10	0	≤0.24	N0	N0/N1a	T1	T1/T2	I/II	I	126	≤300	yes
133	Female	62	84	84	survival	no	84	no	Only CLND	no	yes	1.4	<=2	7	2	0	0	7	≤10	2	≤10	0.285714	＞0.24	N1a	N0/N1a	T4	T3/T4	III/IV	IV	266	≤300	yes
134	Male	62	86	86	survival	no	86	no	Only CLND	no	yes	1	<=2	2	0	0	0	2	≤10	0	≤10	0	≤0.24	N0	N0/N1a	T4	T3/T4	III/IV	IV	107	≤300	no
135	Male	63	15	15	survival	no	15	yes	CLND + LLND	yes	yes	2.2	>2	7	2	70	31	77	>10	33	>10	0.428571	＞0.24	N1b	N1b	T3	T3/T4	III/IV	IV	2000	＞300	no
136	Female	63	52	52	survival	no	52	yes	CLND + LLND	no	yes	2.5	>2	4	3	24	6	28	>10	9	≤10	0.321429	＞0.24	N1b	N1b	T3	T3/T4	III/IV	IV	649	＞300	no
137	Female	63	64	64	survival	no	64	no	Only CLND	no	no	1.5	<=2	6	6	0	0	6	≤10	6	≤10	1	＞0.24	N1a	N0/N1a	T1	T1/T2	III/IV	III	1346	＞300	no
138	Male	63	76	76	survival	no	76	no	Only CLND	no	no	1.5	<=2	1	1	0	0	1	≤10	1	≤10	1	＞0.24	N1a	N0/N1a	T1	T1/T2	III/IV	III	16.2	≤300	yes
139	Female	63	83	83	survival	no	83	yes	CLND + LLND	no	yes	1.6	<=2	4	2	13	1	17	>10	3	≤10	0.176471	≤0.24	N1b	N1b	T4	T3/T4	III/IV	IV	80.3	≤300
140	Male	63	114	84		no	84	no	CLND + LLND	no	no	2.5	>2	3	0	16	0	19	>10	0	≤10	0	≤0.24	N0	N0/N1a	T2	T1/T2	I/II	II	199.8	≤300	no
141	Female	64	37	37	survival	no	37	no	Only CLND	no	yes	0.5	<=2	1	0	0	0	1	≤10	0	≤10	0	≤0.24	N0	N0/N1a	T3	T3/T4	I/II	II	18.8	≤300	yes
142	Male	64	80	80	survival	no	80	no	Only CLND	no	yes	1.3	<=2	6	1	0	0	6	≤10	1	≤10	0.166667	≤0.24	N1a	N0/N1a	T4	T3/T4	III/IV	IV	70.3	≤300	yes
143	Female	65	30	16	death			yes	CLND + LLND	yes	yes	7	>2	6	2	44	10	50	>10	12	>10	0.24	＞0.24	N1b	N1b	T3	T3/T4	III/IV	IV	1496	＞300
144	Female	65	49	26	death	yes	5	yes	CLND + LLND	no	no	1.2	<=2	9	5	9	3	18	>10	8	≤10	0.444444	＞0.24	N1b	N1b	T1	T1/T2	III/IV	IV	2	≤300	yes
145	Male	65	68	68	survival	no	68	no	Only CLND	no	no	0.8	<=2	1	1	0	0	1	≤10	1	≤10	1	＞0.24	N1a	N0/N1a	T1	T1/T2	III/IV	III	47.4	≤300	yes
146	Female	65	73	73	survival	no	73	no	CLND + LLND	no	yes	4.5	>2	7	0	18	2	25	>10	2	≤10	0.08	≤0.24	N1b	N1b	T3	T3/T4	III/IV	IV	2000	＞300	yes
147	Female	65	99	99	survival	no	99	no	Only CLND	no	no	2	<=2	0	0	0	0	0	≤10	0	≤10			N0	N0/N1a	T1	T1/T2	I/II	I	1178	＞300	yes
148	Male	65	107	107	survival	no	107	no	CLND + LLND	no	no	3	>2	6	1	17	1	23	>10	2	≤10	0.086957	≤0.24	N1b	N1b	T2	T1/T2	III/IV	IV	70	≤300	yes
149	Male	66	25	25	survival	no	25	yes	CLND + LLND	no	no	1.4	<=2	12	11	28	11	40	>10	22	>10	0.55	＞0.24	N1b	N1b	T1	T1/T2	III/IV	IV	303	＞300	no
150	Female	66	38	38	survival	no	38	yes	CLND + LLND	no	no	1.2	<=2	4	2	41	7	45	>10	9	≤10	0.2	≤0.24	N1b	N1b	T1	T1/T2	III/IV	IV
151	Female	66	43	43	survival	no	43	no	Only CLND	no	no	1.3	<=2	3	0	0	0	3	≤10	0	≤10	0	≤0.24	N0	N0/N1a	T1	T1/T2	I/II	I	439	＞300	yes
152	Male	66	60	60	survival	no	60	no	CLND + LLND	no	no	1.1	<=2	8	1	33	1	41	>10	2	≤10	0.04878	≤0.24	N1b	N1b	T1	T1/T2	III/IV	IV	391	＞300	yes
153	Male	66	61	61	survival	no	61	no	Only CLND	no	no	0.7	<=2	1	0	0	0	1	≤10	0	≤10	0	≤0.24	N0	N0/N1a	T1	T1/T2	I/II	I	159	≤300	no
154	Female	67	72	72	survival	yes	36	no	Only CLND	no	yes	1.3	<=2	0	0	0	0	0	≤10	0	≤10			N0	N0/N1a	T4	T3/T4	III/IV	IV	323	＞300	no
155	Male	68	19	19	survival	no	19	no	Only CLND	no	no	0.8	<=2	1	0	0	0	1	≤10	0	≤10	0	≤0.24	N0	N0/N1a	T1	T1/T2	I/II	I	20.7	≤300
156	Male	69	51	51	survival	no	51	no	CLND + LLND	no	no	5.5	>2	5	2	28	11	33	>10	13	>10	0.393939	＞0.24	N1b	N1b	T3	T3/T4	III/IV	IV	2000	＞300	no
157	Female	69	78	78	survival	no	78	no	Only CLND	no	no	2.5	>2	6	0	0	0	6	≤10	0	≤10	0	≤0.24	N0	N0/N1a	T2	T1/T2	I/II	II	987	＞300	yes
158	Male	72	21	21	survival	no	21	no	Only CLND	no	no	5	>2	14	3	0	0	14	>10	3	≤10	0.214286	≤0.24	N1a	N0/N1a	T3	T3/T4	III/IV	III	2000	＞300	no
159	Female	73	36	36	survival	no	36	no	Only CLND	no	no	0.9	<=2	1	0	0	0	1	≤10	0	≤10	0	≤0.24	N0	N0/N1a	T1	T1/T2	I/II	I	76.1	≤300
160	Male	73	77	77	survival	no	77	no	CLND + LLND	no	yes	2	<=2	3	3	28	3	31	>10	6	≤10	0.193548	≤0.24	N1b	N1b	T4	T3/T4	III/IV	IV	1652	＞300	yes
